# Supplementary material for: Prediction of myopia development among Chinese school-aged children using refraction data from electronic medical records: A retrospective, multicentre machine learning study
Source: PubMed Central journal article supplement (PMC6219762; doi:10.1371/journal.pmed.1002674), 2018-11-06
Supplement: pmed.1002674.s001.pdf [file pmed.1002674.s001.pdf]

**S1 Code. The source code of the algorithms training and validation.**

```
library(randomForest)
library(pROC)

#input ZOC data
ZOC<- read.csv("F: /ZOC.csv",header=TRUE)

#input Other 7 Centers data, GOAL, RELS
centers <- read.csv("F: /7centers.csv",header=TRUE)
GOAL <- read.csv("F: /GOAL.csv",header=TRUE)
RELS <- read.csv("F: /RELS.csv",header=TRUE)

#Training of ZOC data (Random forest algorithm)
#SE=targeted spherical equivalent; AAE=age at exam; APR=annual progression rate;
#OSE=original spherical equivalent
set.seed(123)
rf_reg<-randomForest(SE~ AAE+APR+OSE,
                     data=ZOC,
                     mtry=2,ntree=500,
                     importance = T)

#10-fold cross validation
cv<- ZOC
set.seed(123)
folds<-createFolds(y= ZOC$SE,k=10)
max=0
num=0

fold<-data.frame()

for(i in 1:10){

  fold_test <- data[folds[[i]],]
  fold_train <- data[-folds[[i]],]

  fold_pre<-randomForest(SE~AAE+APR+OSE ,
                        data=fold_train,
                        mtry=2,ntree=500,
                        importance = T)

  fold_predict <- predict(fold_pre,newdata=fold_test)
```

```
fold_test$predict = fold_predict

fold_predict2 <- ifelse(fold_predict<=-6,1,0)

fold_test$predict2 = fold_predict2

fold<-rbind(fold,fold_test)
}
```

**#Input 10-fold, OOB, Other 7 Centers data, GOAL, RELS in turn, to calculate index respectively**

**####1. Input 10-fold**

```
rf.reg.pred<- fold$predict
data.test.new <- fold
```

```
pred.fore2<- fold$predict
rf.pred<-fold$predict2
```

**####2. Input OOB**

```
rf.reg.pred<- rf_reg$predicted
data.test.new <- ZOC
```

```
pred.fore2<- rf_reg$predicted
rf.pred<-ifelse(pred.fore2<=-6,1,0)
```

**####3. Input Testing other 7 centers data, GOAL, RELS**

**#3.1 7centers**

```
rf.reg.pred<- predict(rf_reg, newdata=centers)
data.test.new <- centers
```

```
pred.fore2<- predict(rf_reg, newdata=centers)
rf.pred<-ifelse(pred.fore2<=-6,1,0)
```

**#3.2 GOAL**

```
rf.reg.pred<- predict(rf_reg, newdata=GOAL)
data.test.new <- GOAL
```

```
pred.fore2<- predict(rf_reg, newdata=GOAL)
```

```

rf.pred<-ifelse(pred.fore2<=-6,1,0)

#3.3 RELS
rf.reg.pred<- predict(rf_reg, newdata=RELS)
data.test.new <- RELS

pred.fore2<- predict(rf_reg, newdata=RELS)
rf.pred<-ifelse(pred.fore2<=-6,1,0)

#####
####Index###

#####Calculate R2 RMSE MAE
degreenew <- list()
pred <- list()
Rsqr <- vector()
Rmse <- vector()
Mae <- vector()
Mean <- vector()
L <- vector()

for (i in 1:10) {
  if (i==11){
    degreenew[[i]] <- data.test.new[data.test.new$time_dif>=i, ]$SE
    pred[[i]] <- rf.reg.pred[data.test.new$time_dif>=i]
  } else{
    degreenew[[i]] <- data.test.new[data.test.new$time_dif==i, ]$SE
    pred[[i]] <- rf.reg.pred[data.test.new$time_dif==i]
  }
  Rsqr[i] <- 1-var(degreenew[[i]]-pred[[i]])/var(degreenew[[i]])
  Rmse[i] <- sqrt(mean((degreenew[[i]]-pred[[i]])^2))
  Mae[i] <- mean(abs(degreenew[[i]]-pred[[i]]))
  Mean[i] <- mean(abs(degreenew[[i]]))
  L[i] <- length(degreenew[[i]])
}

result <- as.data.frame(matrix(NA,length(L),6))
result[, 1:6] <- c(c(1:length(L)),Rsqr,Rmse,Mae,Mean,L)
names(result) <- c('years','R2 ','RMSE','MAE','MEAN','n')
result <- t(result)

```

**#####Calculate ROC AUC**

```

auc<-vector()
t <- vector()
fp <- vector()
fn <- vector()
L <- vector()
p <- vector()
n <- vector()

for (i in 1:10) {
  if (i==11){
    pred <- rf.pred[data.test.new$time_dif >=i]
    y <- data.test.new[data.test.new$time_dif>=i, 'last']
    pred.p<-pred.fore2[data.test.new$time_dif>=i]
    roc.p<-roc(data.test.new[data.test.new$time_dif>=i, ]$last,pred.p,plot=FALSE)
  } else{
    pred <- rf.pred[data.test.new$time_dif==i]
    y <- data.test.new[data.test.new$time_dif==i, 'last']
    pred.p<-pred.fore2[data.test.new$time_dif==i]
    pred.p<-pred.fore2[data.test.new$time_dif==i]
    roc.p<-roc(data.test.new[data.test.new$time_dif==i, ]$last,pred.p,plot=FALSE)
  }
  t[i] <- prop.table(table(pred==y))[2]
  fp[i] <- sum(y==0&pred==1)/sum(y==0)
  fn[i] <- sum(y==1&pred==0)/sum(y==1)
  L[i] <- length(y)
  p[i] <- sum(y==1)
  n[i] <- sum(y==0)
  auc[i]<-roc.p$auc
}

```

```

result2 <- as.data.frame(matrix(NA,length(L),8))
result2[, 1:8] <- c(c(1:length(L)),t,fp,fn,L,p,n,auc)
names(result2) <- c("years","ACC","FPR","FNR","n","Pn","Nn","auc")
result2 <- t(result2)

```

**#####output index dataset in turn**

```

write.csv(result,file="F: /result.csv")
write.csv(result2,file="F: /result2.csv")

```
